# Supplementary material
Source: PubMed Central journal article supplement (PMC2928908)

## Supplemental Data

**Supplemental Table 1. Pearson's correlation coefficients between log adiponectin and three measures of adiposity in West Africans.**

|            | <i>r</i> ( <i>p</i> -value) |                  |                  |
|------------|-----------------------------|------------------|------------------|
|            | All                         | Men              | Women            |
| <b>BMI</b> | -0.203 (<0.0001)            | -0.266 (<0.0001) | -0.291 (<0.0001) |
| <b>WC</b>  | -0.154 (<0.0001)            | -0.191 (0.001)   | -0.172 (<0.0001) |
| <b>PFM</b> | 0.058 (0.132)               | 0.018 (0.763)    | -0.119 (0.017)   |

BMI=Body mass index, WC=Waist circumference, PFM=Percent fat mass.

**Supplemental Table 2: Linear Regression Models evaluating the relationship between adiponectin and measures of obesity in West Africans**

| Model      | Age                      | Gender                   | Country                | BMI                       | WC                        | PFM                     | Adjusted $R^2$ |
|------------|--------------------------|--------------------------|------------------------|---------------------------|---------------------------|-------------------------|----------------|
| <b>I</b>   | 0.245 (0.001)<br><0.0001 | 0.219 (0.023)<br><0.0001 | 0.098 (0.026)<br>0.009 |                           |                           |                         | 0.116          |
| <b>II</b>  | 0.267 (0.001)<br><0.0001 | 0.312 (0.023)<br><0.0001 | 0.077 (0.025)<br>0.034 | -0.299 (0.002)<br><0.0001 |                           |                         | 0.195          |
| <b>III</b> | 0.293 (0.001)<br><0.0001 | 0.245 (0.023)<br><0.0001 | 0.080 (0.026)<br>0.029 |                           | -0.228 (0.001)<br><0.0001 |                         | 0.165          |
| <b>IV</b>  | 0.252 (0.001)<br><0.0001 | 0.282 (0.028)<br><0.0001 | 0.089 (0.027)<br>0.021 |                           |                           | -0.103 (0.001)<br>0.019 | 0.122          |

Data displayed are  $\beta$ , standard error and *p*-values, respectively.

BMI=Body Mass Index, WC=Waist Circumference, PFM=Percent Fat Mass

**Supplemental Table 3. Association of adiponectin with serum lipids.**

| Measure                  | Univariate Model |          | Adjusted Model |          |
|--------------------------|------------------|----------|----------------|----------|
|                          | $\beta$ (SE)     | <i>p</i> | $\beta$ (SE)   | <i>p</i> |
| <b>Total cholesterol</b> | 0.169 (0.000)    | <0.0001  | 0.127 (0.000)  | 0.001    |
| <b>TG</b>                | -0.118 (0.000)   | <0.002   | -0.113 (0.000) | 0.002    |
| <b>HDL</b>               | 0.242 (0.001)    | <0.0001  | 0.203 (0.001)  | <0.0001  |

TG=Triglycerides, HDL=High density lipoprotein cholesterol. Right column adjusted for age, gender, country, and BMI.

**Supplemental Figure 1. Log adiponectin by age in West Africans.**

**A. Men**

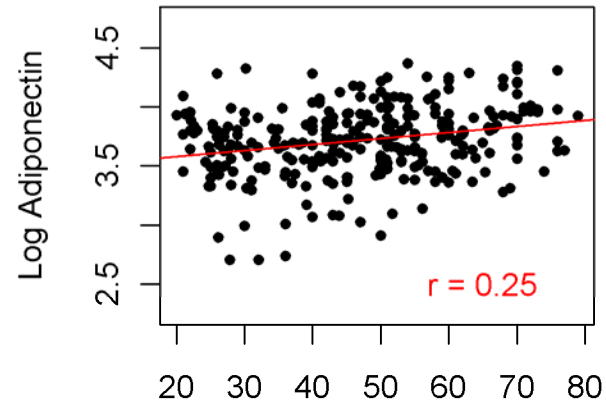

**B. Women**

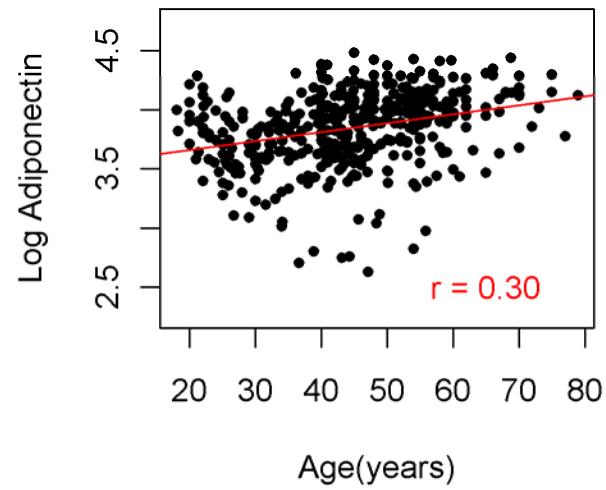

**Supplemental Figure 2. Differences in mean adiponectin and serum lipid levels by BMI.**

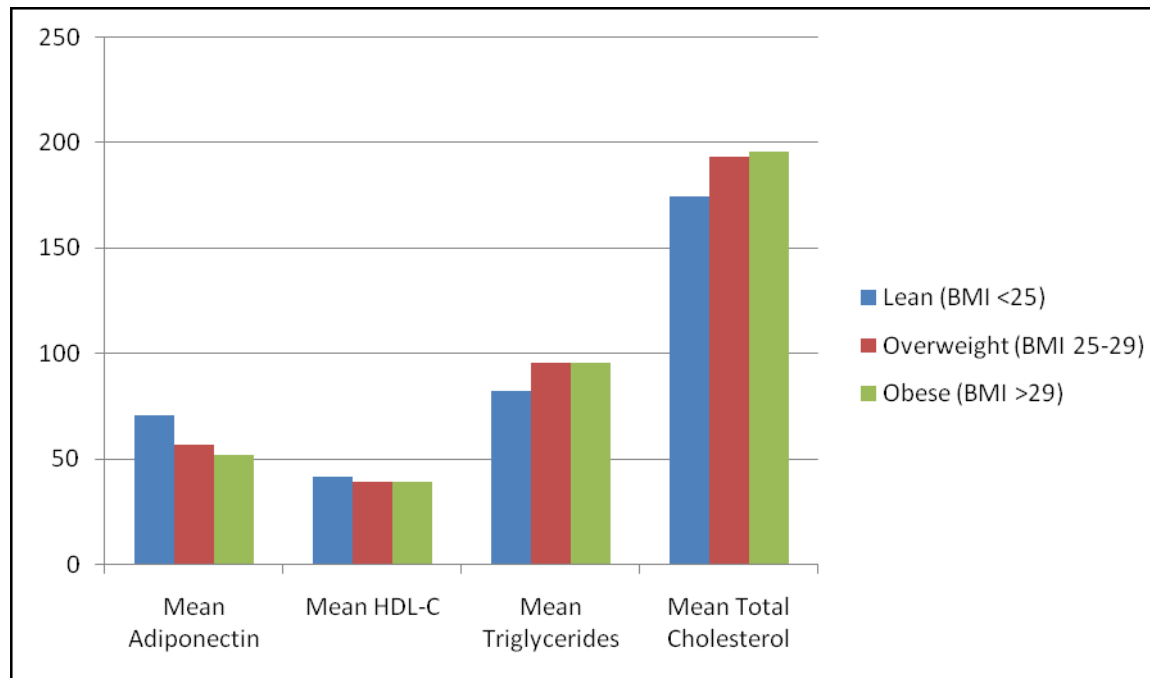

Supplement: jc.2009-2765_1.pdf [file jc.2009-2765_1.pdf]
